# Supplementary material for: The Phenoxyphenol Compound diTFPP Mediates Exogenous C2-Ceramide Metabolism, Inducing Cell Apoptosis Accompanied by ROS Formation and Autophagy in Hepatocellular Carcinoma Cells
Source: MDPI journal article supplement (doi:10.3390/antiox10030394), 2021-03-05
Supplement: s1 [file s1]

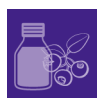

# Supplementary Materials: The Phenoxyphenol Compound diTFPP Mediates Exogenous C<sub>2</sub>-Ceramide Metabolism, Inducing Cell Apoptosis Accompanied by ROS Formation and Autophagy in Hepatocellular Carcinoma Cells

Wen-Tsan Chang <sup>1,2,3†</sup>, Yung-Ding Bow <sup>4†</sup>, Yen-Chun Chen <sup>5</sup>, Chia-Yang Li <sup>6</sup>, Jeff Yi-Fu Chen <sup>5</sup>, Yi-Ching Chu <sup>7</sup>, Yen-Ni Teng <sup>8</sup>, Ruei-Nian Li <sup>9</sup> and Chien-Chih Chiu <sup>3,5,10,11,12,\*</sup>

<sup>1</sup> Division of General and Digestive Surgery, Department of Surgery, Kaohsiung Medical University Hospital, Kaohsiung 807, Taiwan; wtchang@kmu.edu.tw

<sup>2</sup> Department of Surgery, School of Medicine, College of Medicine, Kaohsiung Medical University, Kaohsiung 807, Taiwan

<sup>3</sup> Center for Cancer Research, Kaohsiung Medical University Hospital, Kaohsiung Medical University, Kaohsiung 807, Taiwan

<sup>4</sup> College of Life Science, Kaohsiung Medical University, Kaohsiung 807, Taiwan; u109850001@kmu.edu.tw

<sup>5</sup> Department of Biotechnology, Kaohsiung Medical University, Kaohsiung 807, Taiwan; r020135@gap.kmu.edu.tw (Y.-C.C.); yifuc@kmu.edu.tw (J.Y.-F.C.)

<sup>6</sup> Graduate Institute of Medicine, College of Medicine, Kaohsiung Medical University, Kaohsiung 807, Taiwan; chiayangli@kmu.edu.tw

<sup>7</sup> Department of Medicinal and Applied Chemistry, Kaohsiung Medical University, Kaohsiung 807, Taiwan; N56094512@ncku.edu.tw

<sup>8</sup> Department of Biological Sciences and Technology, National University of Tainan, Tainan 700, Taiwan; tengyenni@mail.nutn.edu.tw

<sup>9</sup> Department of Biomedical Science and Environment Biology, Kaohsiung Medical University, Kaohsiung 807, Taiwan; runili@kmu.edu.tw

<sup>10</sup> Department of Biological Sciences, National Sun Yat-Sen University, Kaohsiung, 804, Taiwan

<sup>11</sup> The Graduate Institute of Medicine, Kaohsiung Medical University, Kaohsiung 807, Taiwan

<sup>12</sup> Department of Medical Research, Kaohsiung Medical University Hospital, Kaohsiung 807, Taiwan

\* Correspondence: cchiu@kmu.edu.tw; Tel.: +886-7-312-1101 (ext. 2368); Fax: +886-7-312-5339

† The authors contributed equally.

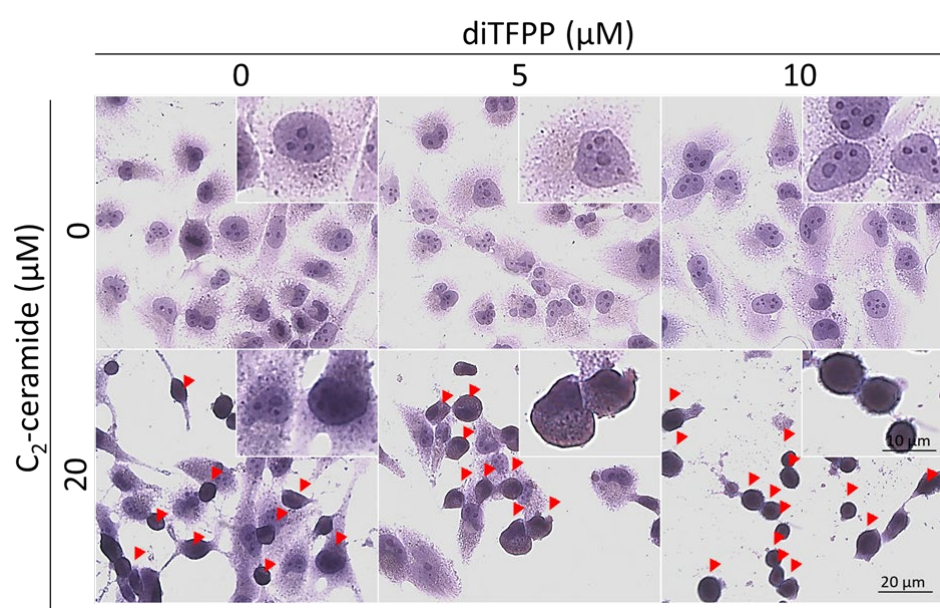

**Figure S1.** The morphology of HA22T cells with hematoxylin staining after diTFPP/C<sub>2</sub>-ceramide treatment. The red arrows indicate pyknotic cells.

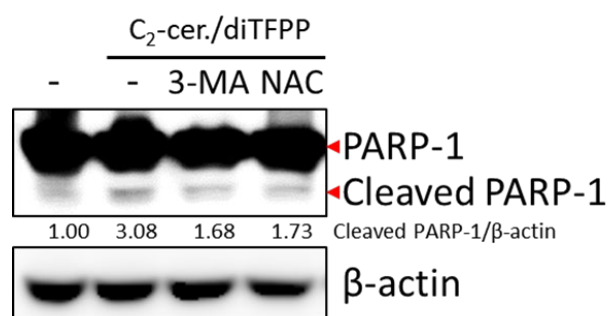

**Figure S2.** Western blot analysis of PARP-1 expression after C<sub>2</sub>-ceramide and diTFPP treatment.

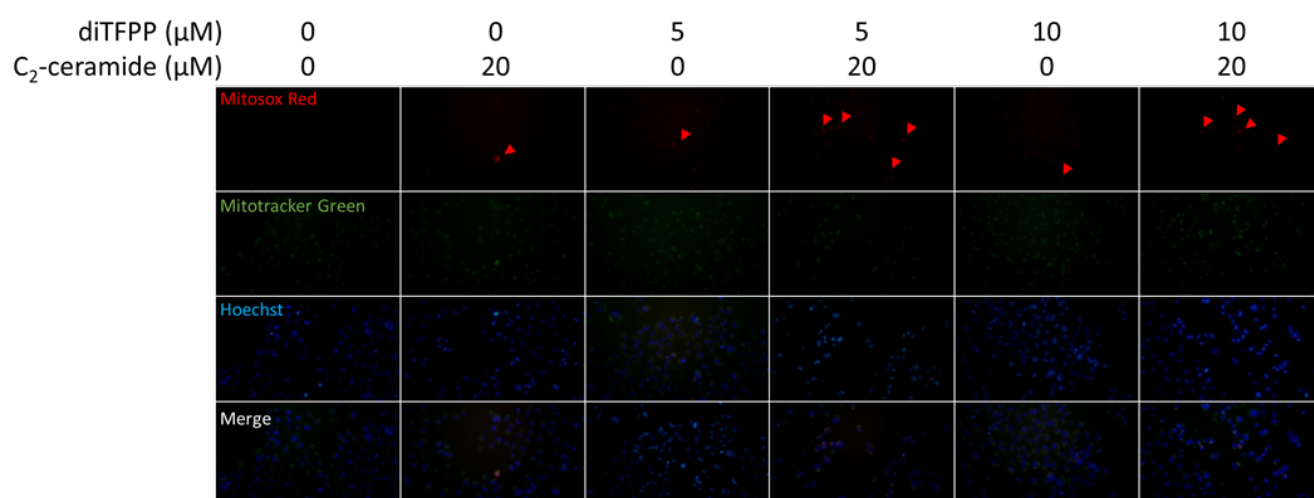

**Figure S3.** Mitochondrial ROS generation in C<sub>2</sub>-ceramide- and diTFPP-treated HA22T cells based on MitoSOX Red (red), MitoTracker Green (green), and Hoechst (blue) staining. Red arrows indicate accumulated mitochondrial ROS.
